# Supplementary material
Source: Springer Nature journal article supplement (https://www.springermedizin.de/resource/supplementary/12883_2010_364_MOESM1_ESM.pdf/9455236)
Supplement: MOESM1 [file 9455236]

Screening Recruitment

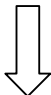

Baseline Measurement

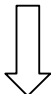

Randomisation  
N = 66

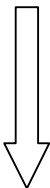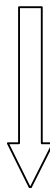

**CONTROL**

Routine physiotherapy and  
standard ward care.

+

Placebo injection

n = 33

**INTERVENTION**

Routine physiotherapy and  
standard ward care.

+

Injection suprascapular nerve  
block

n = 33

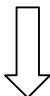

Follow-up 1 week

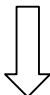

Follow-up 4 week

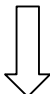

Follow-up 12 week

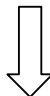

Follow-up 1 week

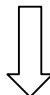

Follow-up 4 week

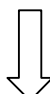

Follow-up 12 week
